# Supplementary material for: Bovine Respiratory Disease: Conventional to Culture-Independent Approaches to Studying Antimicrobial Resistance in North America
Source: MDPI journal article supplement (doi:10.3390/antibiotics11040487), 2022-04-05
Supplement: s1 [file s1]

**Table S1.** Main features from the antimicrobial susceptibility studies included in this review that targeted the major BRD-related bacteria: *Mannheimia haemolytica*, *Pasteurella multocida*, *Histophilus somni*, and *Mycoplasma bovis*

| Samples origin and sampling period                                        | Type and no. of samples                              | Sampling points and study goals                                                                                               | Bacteria targeted and no. isolates tested                                                          | ASTs protocol                     | Highlights of the study                                                                      | Ref              |
|---------------------------------------------------------------------------|------------------------------------------------------|-------------------------------------------------------------------------------------------------------------------------------|----------------------------------------------------------------------------------------------------|-----------------------------------|----------------------------------------------------------------------------------------------|------------------|
| <i>Pasteurellaceae</i> AMR active surveillance studies                    |                                                      |                                                                                                                               |                                                                                                    |                                   |                                                                                              |                  |
| Two commercial feedlots, southern Alberta, CA. 2008–2009                  | NPS, general feedlot cattle population. n = 4,548    | At feedlot entry/exit. AMR investigation of beef industry relevant antimicrobials.                                            | Mh, n = 416                                                                                        | DD                                | Low Mh AMR at entry and exit.                                                                | [1] <sup>1</sup> |
| Four commercial feedlots, southern Alberta, Canada. 2007–2010             | NPS, general feedlot cattle population. n = 5,814    | At feedlot entry and ≥ 60 DOF. TUL resistance evaluation 12 months after its approval in Canada.                              | Mh, n = 4,548                                                                                      | AD (n = 4,548) and BM (n = 5)     | Low TUL-resistance that did not change over study period.                                    | [2]              |
| Two commercial feedlots, southern Alberta, Canada. 2008–2009              | NPS, BRD-diseased and healthy feedlot cattle. n = 90 | At feedlot: healthy at entry and exit, BRD-diseased during feeding period. Mh AMR investigation associated with BRD.          | Mh, healthy n = 49, sick n = 41                                                                    | BM                                | Overall low Mh AMR; higher AMR among isolates from sick animals as per healthy.              | [3] <sup>1</sup> |
| Four commercial feedlots, southern and central Alberta, Canada. 2007–2010 | DNPS, general feedlot cattle population. n = 5,968   | At feedlot entry and > 30 DOF. Risk factors associated with Mh AMR and cattle health outcome.                                 | Mh, n = 2,989                                                                                      | DD (n = 1,789) and BM (n = 2,833) | Overall low Mh AMR.                                                                          | [4]              |
| One commercial stocker operation, central Georgia, USA. 2016              | DNPS, general feedlot cattle population. n = 169     | At feedlot entry and 10-14 DOF or when diagnosed with BRD (n = 3). Determine Mh AMR at entry and later in the feeding period. | Mh, n = 79, 366 <sup>2</sup>                                                                       | DD                                | Overall low AMR at entry that increased substantially after feedlot placement.               | [5]              |
| One commercial feedlot, Mississippi, USA. 2016                            | NPS, general feedlot cattle population. n = 50       | At feedlot entry and 7, 14, and 21 DOF. Determine Mh AMR and MDR at entry and during first 21 DOF.                            | Mh, n = 5, 27, 44, 40 <sup>2</sup><br>Pm, n = 6<br>Hs, n = 0                                       | DD (Mh and Pm) and BM (Mh)        | Mh AMR increased after feedlot placement. High proportion of MDR Mh at day 7 was unexpected. | [6]              |
| Three commercial cow-calf ranches, southern Alberta, Canada. 2016         | DNPS, general beef cattle population. n = 120        | At calf-ranch vaccination, feedlot entry, and 40 DOF. Determine the origin of AMR in respiratory bacteria.                    | Mh, n = 25, 16, 29 <sup>2</sup><br>Pm, n = 1, 21, 59 <sup>2</sup><br>Hs, n = 1, 0, 30 <sup>2</sup> | BM                                | AMR can increase from calf-ranch to feedlot varying across herds. Overall low Mh AMR.        | [7]              |

|                                                                                |                                                                                     |                                                                                                                                             |                                                                                                     |    |                                                                                                                                                                            |      |
|--------------------------------------------------------------------------------|-------------------------------------------------------------------------------------|---------------------------------------------------------------------------------------------------------------------------------------------|-----------------------------------------------------------------------------------------------------|----|----------------------------------------------------------------------------------------------------------------------------------------------------------------------------|------|
| Ten commercial feedlots in Alberta, Canada. 2017–2019                          | DNPS, general beef cattle population. n = 2,824                                     | At feedlot processing. Investigate the epidemiology and risk factors for AMR at feedlot entry.                                              | Mh, n = 490<br>Pm, n = 515<br>Hs, n = 241                                                           | BM | Dairy-type feedlot cattle had higher AMR as per beef-type.<br>Beef-type cattle sourced from backgrounding operations had higher AMR as per auction or ranch-direct calves. | [8]  |
| Twenty-two commercial cow–calf operations in Alberta, Canada. 2017             | DNPS, general beef cattle population. n = 1,666                                     | At spring processing, weaning or feedlot processing, and feedlot re-processing.<br>Identify risk factors associated with AMR including AMU. | Mh, n = 1, 30, 27 <sup>2</sup><br>Pm, n = 24, 88, 38 <sup>2</sup><br>Hs, n = 0, 10, 20 <sup>2</sup> | BM | Metaphylactic macrolides at feedlot entry were associated with higher macrolide MICs later in the feeding period.                                                          | [9]  |
| <b><i>Pasteurellaceae</i> AMR passive surveillance studies</b>                 |                                                                                     |                                                                                                                                             |                                                                                                     |    |                                                                                                                                                                            |      |
| Oklahoma Animal Disease Diagnostic Laboratory, USA 1994–2002                   | Lung tissue or swab from bovine pneumonia                                           | 6–18-month-old beef cattle<br>Investigate AMR of Mh, Pm, and Hs from bovine pneumonia                                                       | Mh, n = 390<br>Pm, n = 292<br>Hs, n = 160                                                           | DD | Mh and Pm susceptibilities to SPE, ERY, FFN, and TIL declined over time                                                                                                    | [10] |
| Twenty-four veterinary diagnostic laboratories across USA and Canada 2000–2009 | Respiratory samples from BRD clinical cases or mortalities                          | Track AMR trends from BRD cases in USA and CA                                                                                               | Mh, n = 2,977<br>Pm, n = 3,291<br>Hs, n = 1,844                                                     | BM | The TIL and TUL MIC <sub>50</sub> and MIC <sub>90</sub> of Mh, Pm, and Hs decreased<br>Decrease of FFN susceptibility among Mh, Pm, and Hs                                 | [11] |
| Kansas State Veterinary Diagnostic Laboratory, USA 2009–2011                   | Lung tissue from BRD clinical cases                                                 | Investigate Mh MDR from BRD cases                                                                                                           | Mh, n = 389                                                                                         | BM | The number of isolates resistant to 5 antimicrobials increased over time                                                                                                   | [12] |
| Commercial feedlots in Alberta (Canada), Texas, and Nebraska (USA)             | NPS and lung tissue from BRD mortalities presenting fibrinous pneumonia n = 68      | During feeding period<br>Characterization of AMR of BRD bacteria from BRD mortalities from feedlots located in CA and USA                   | Mh, n = 55<br>Pm, n = 8<br>Hs, n = 10                                                               | BM | Overall high AMR among isolates of the three bacterial species<br>Presence of ICE in Mh, Pm, and Hs from USA                                                               | [13] |
| Sixty commercial feedlots in southern Alberta, Canada 2014–2015                | Samples from BRD clinical cases (DNPS) and mortalities (different types of samples) | During feeding period<br>Investigation of AMR in BRD bacteria from clinical cases and mortalities                                           | Mh, n = 251<br>Pm, n = 118<br>Hs, n = 80                                                            | BM | High AMR to macrolides (Mh, Pm) and oxytetracycline (Mh, Pm, Hs)                                                                                                           | [14] |

|                                                                        |                                                                                                                   |                                                                                                           |                                         |    |                                                                                                                                                          |      |
|------------------------------------------------------------------------|-------------------------------------------------------------------------------------------------------------------|-----------------------------------------------------------------------------------------------------------|-----------------------------------------|----|----------------------------------------------------------------------------------------------------------------------------------------------------------|------|
| n = 740                                                                |                                                                                                                   |                                                                                                           |                                         |    |                                                                                                                                                          |      |
| Four commercial feedlots in southern Alberta, Canada 2015–2016         | TTA from BRD clinical cases and healthy beef cattle<br>n = 210 diseased<br>n = 107 healthy                        | During feeding period<br>Investigation of AMR in BRD bacteria from clinical cases and healthy beef cattle | Mh, n = 78<br>Pm, n = 135<br>Hs, n = 63 | BM | High AMR to macrolides (Mh, Pm), oxytetracycline (Mh, Pm, Hs), and penicillin (Hs)<br><br>Higher Mh and Hs AMR isolated from sick animals as per healthy | [15] |
| <i>Mycoplasma bovis</i> AMR active and passive surveillance studies    |                                                                                                                   |                                                                                                           |                                         |    |                                                                                                                                                          |      |
| Different regions across USA 2002–2003                                 | Four different types of tissues, including respiratory samples, from clinical cases from beef and dairy cows      | Determination of the antimicrobial activity against drugs used to treat calves in USA                     | Mb, n = 223                             | BM | High MIC50 and MIC90 for macrolides <sup>3</sup>                                                                                                         | [16] |
| One commercial feedlot in Saskatchewan, Canada 2007–2008               | DNS (healthy and diseased) and lung/joint (mortalities)<br>n = 122 healthy<br>n = 111 morbidities and mortalities | During first 130 DOF<br>Determine AMR from clinical cases and mortalities                                 | Mb, n = 51                              | BM | High TIL MIC50                                                                                                                                           | [17] |
| Sixty commercial feedlots in southern Alberta, Canada 2015–2016        | Samples from BRD clinical cases (DNPS) and mortalities (different types of samples)<br>n = 740                    | During feeding period<br>Investigation of AMR in BRD bacteria from clinical cases and mortalities         | Mb, n = 226                             | BM | High macrolide MIC50                                                                                                                                     | [14] |
| Animal Health Laboratory at the University of Guelph, Canada 1978–2019 | Samples from clinical cases; mainly respiratory (62%), milk, and joint samples                                    | Explore MIC changes over time                                                                             | Mb, n = 210                             | BM | MIC50 increase for TETs, TIL, and TYL <sup>4</sup>                                                                                                       | [18] |
| Western Canada and Idaho, USA 2006–2018                                | DNPS (healthy and diseased*), lung, and joint<br>*Mb pneumonia or CPPS                                            | During feeding period<br>Explore antimicrobial susceptibility from healthy, diseased, and dead cattle     | Mb, n = 211                             | BM | High macrolide MICs even among healthy cattle<br>MICs tended to increase over time and were higher among death cattle as per healthy                     | [19] |

|                                                                    |                                                 |                                                                                                                                          |                                |    |                                                                                                         |     |
|--------------------------------------------------------------------|-------------------------------------------------|------------------------------------------------------------------------------------------------------------------------------------------|--------------------------------|----|---------------------------------------------------------------------------------------------------------|-----|
| Ten commercial feedlots in Alberta, Canada. 2017–2019              | DNPS, general beef cattle population. n = 2,824 | At feedlot processing. Investigate the epidemiology and risk factors for AMR at feedlot entry.                                           | Mb, n = 222                    | BM | High macrolide MICs regardless of cattle type.                                                          | [8] |
| Twenty-two commercial cow–calf operations in Alberta, Canada. 2017 | DNPS, general beef cattle population. n = 1,666 | At spring processing, weaning or feedlot processing, and feedlot re-processing. Identify risk factors associated with AMR including AMU. | Mb, n = 2, 19, 28 <sup>2</sup> | BM | High macrolide MICs regardless of sampling point. Increase of FFN-resistance during the feeding period. | [9] |

AD, agar dilution; AMR, antimicrobial resistance; AMU, antimicrobial use; AST, antimicrobial susceptibility test; BM, broth microdilution; BRD, bovine respiratory disease; CPPS, chronic pneumonia and polyarthritis syndrome; DD, disk diffusion; DNPS, deep nasopharyngeal swabs; DNS, deep nasal swab; DOF, days on feed; ERY, erythromycin; FFN, florfenicol; H, healthy; Hs, *Histophilus somni*; ICE, integrative and conjugative element; LRT, lower respiratory tract; Mb, *Mycoplasma bovis*; MDR, multidrug resistance; Mh, *Mannheimia haemolytica*; MIC, minimum inhibitory concentration; no., number; NPS, nasopharyngeal swabs; Pm, *Pasteurella multocida*; SPE, spectinomycin; TETs, tetracyclines; TIL, tilimicosin; Tp, *Trueperella pyogenes*; TTA, trans-tracheal aspiration; TUL, tulathromycin; tx, treatment; TYL, tylosin; URT, upper respiratory tract.

<sup>1</sup> Klima et al. (2014a) characterized a subset of isolates already tested on Klima et al. (2011).

<sup>2</sup> Number of bacterial isolates tested by sampling point.

<sup>3</sup> The MIC distributions obtained from isolates recovered from different types of tissues showed remarkable similarity.

<sup>4</sup> The MIC distributions obtained from isolates recovered from different breeds or tissues did not differ.

[1] Klima et al. 2011; [2] Alexander et al. 2013; [3] Klima et al. 2014a; [4] Noyes et al. 2015; [5] Snyder et al. 2017; [6] Woolums et al. 2018; [7] Guo et al. 2020; [8] Andres-Lasheras et al. 2021; [9] Nobrega et al., 2021; [10] Welsh et al. 2004; [11] Portis et al. 2012; [12] Lubbers and Hanzlicek. 2013; [13] Klima et al. 2014b; [14] Anholt et al. 2017; [15] Timsit et al. 2017; [16] Rosenbusch et al. 2005; [17] Hendrick et al. 2013; [18] Cai et al. 2019; [19] Jelinski et al. 2020.
